# Supplementary material for: Nanostructured and Photochromic Material for Environmental Detection of Metal Ions
Source: MDPI journal article supplement (doi:10.3390/molecules24234243), 2019-11-21
Supplement: s1 [file s1]

## **Nanostructured and photochromic material for environmental detection of metal ions**

Raphael C. L. Machado <sup>1</sup>, Frank Alexis <sup>2</sup>, Frederico B. De Sousa <sup>1,\*</sup>

<sup>1</sup>Laboratório de Sistemas Poliméricos e Supramoleculares (LSPS) –Instituto de Física e Química, Universidade Federal de Itajubá (UNIFEI), Itajubá, 37500-903, MG, Brazil.

<sup>2</sup>School of Biological Sciences and Engineering, Yachay Tech, San Miguel de Urcuquí, Ibarra EC 100150, Ecuador; falexis@yachaytech.edu.ec

\*Corresponding author:

Frederico Barros de Sousa

Instituto de Física e Química, Universidade Federal de Itajubá, UNIFEI, Itajubá, 37500-903, Brazil

Phone: 55-35-3629-1757

Email: fredbsousa@unifei.edu.br & fredbsousa@gmail.com

Supplementary Material 1:

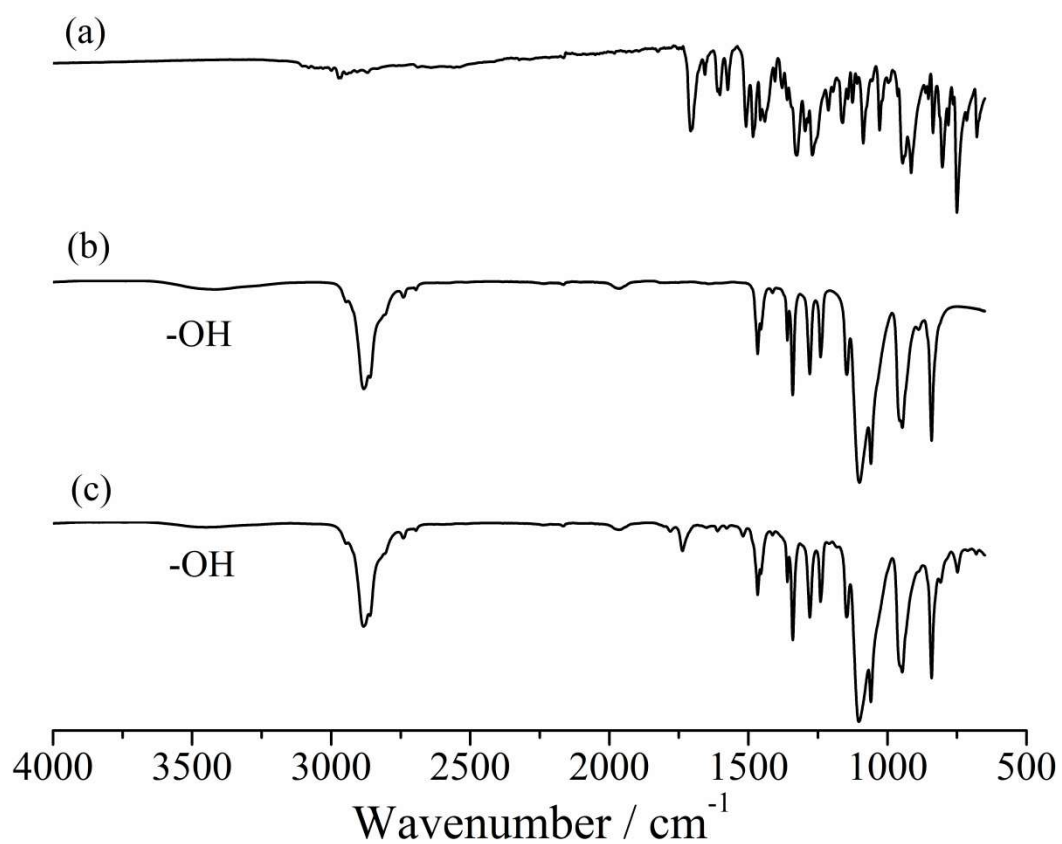

Figure S1. FTIR-ATR spectra of (a) SPCOOH, (b) PEG 2000 and (c) PEGSP2.

Supplementary Material 2:

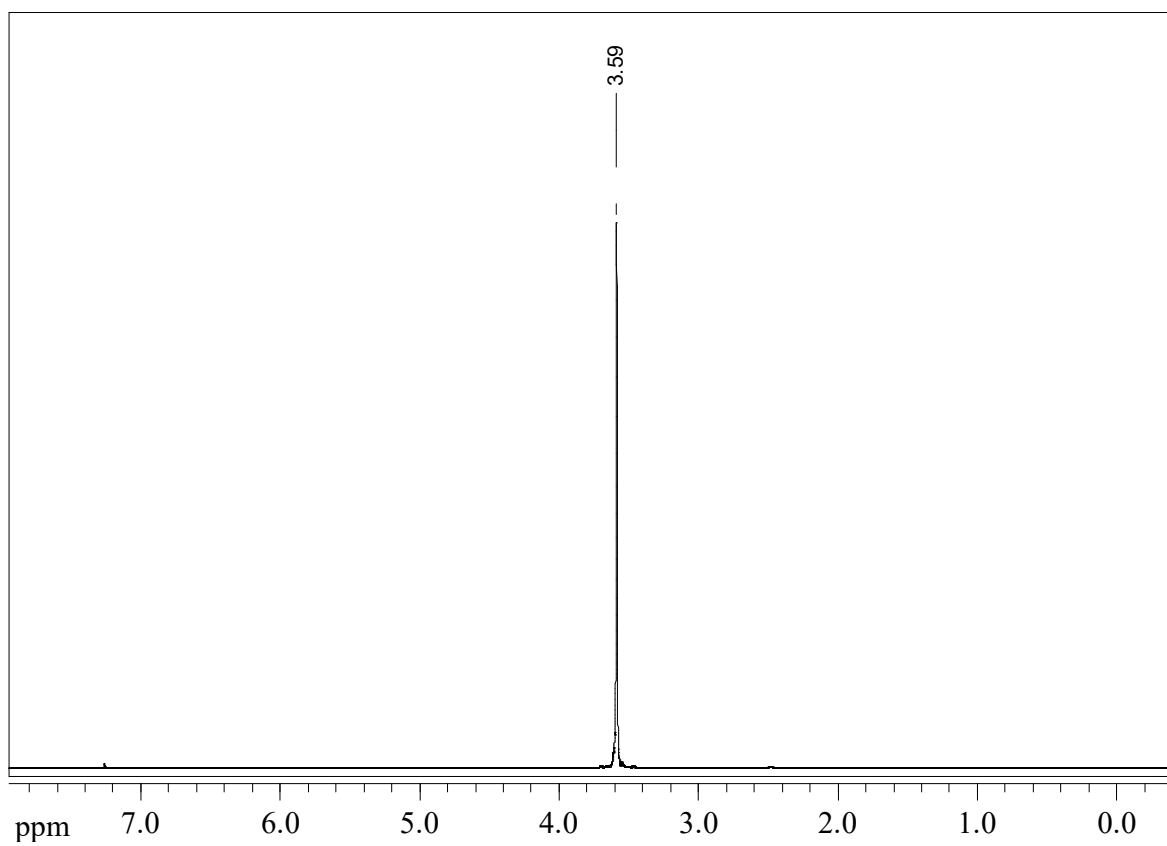

Figure S2.  $^1\text{H}$  NMR spectrum of PEG 2000 in  $\text{CDCl}_3$ , at 600 MHz and 27 °C.

Supplementary Material 3:

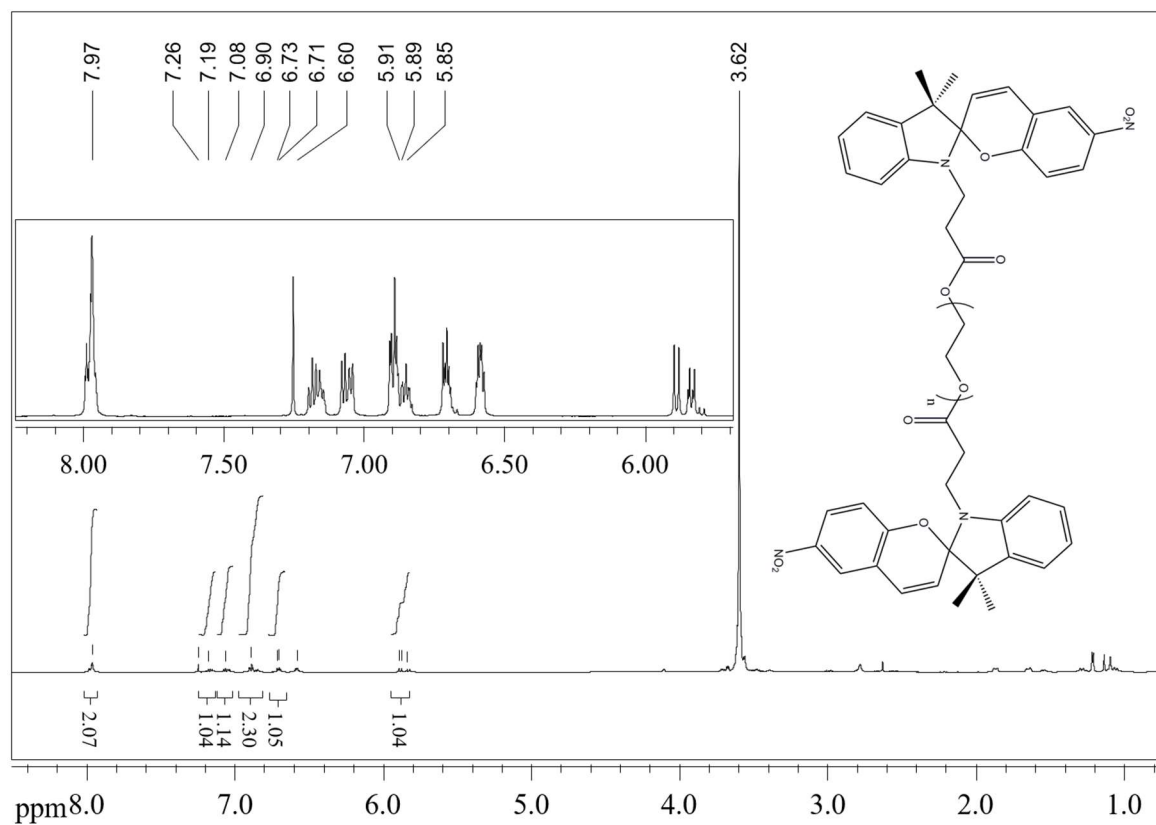

Figure S3.  $^1\text{H}$  NMR spectrum of PEGSP2 in  $\text{CDCl}_3$ , at 600 MHz and 27 °C and proposed structure for PEGSP2.

Supplementary Material 4:

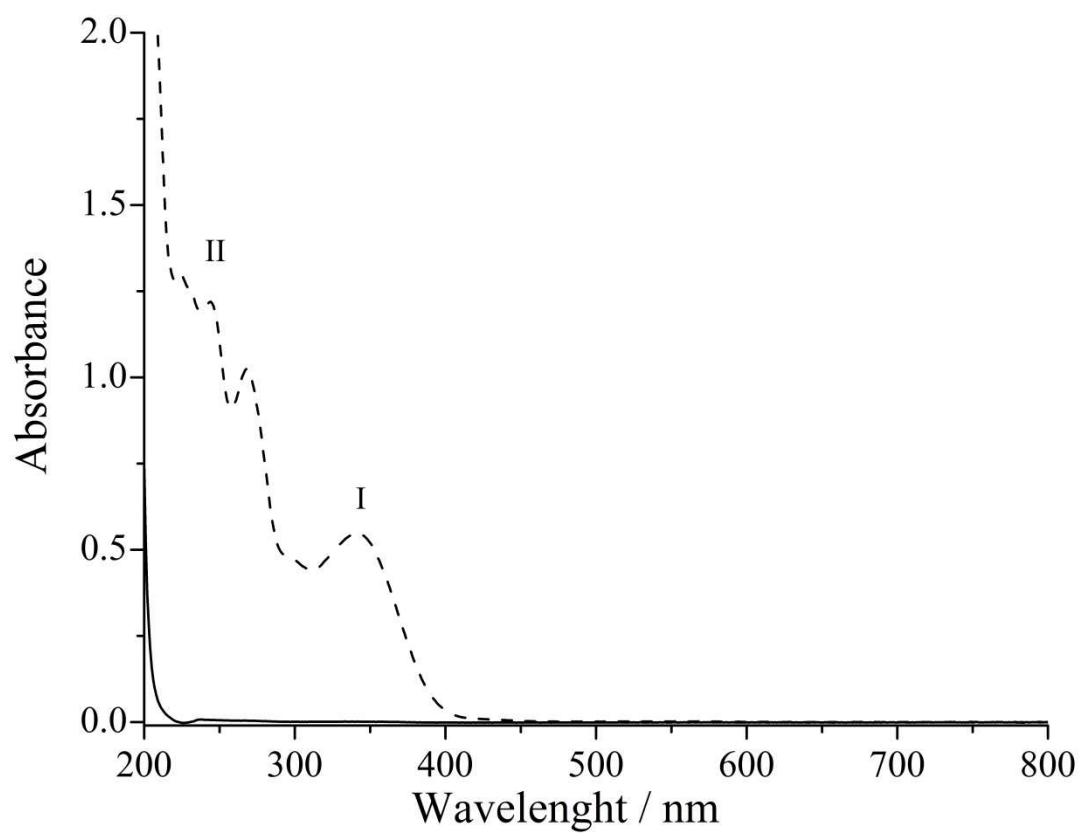

Figure S4. Electronic spectra of PEG 2000 at 2.1 mmol.L<sup>-1</sup> and PEGSP2 at 0.062 mmol.L<sup>-1</sup>.

Supplementary Material 5:

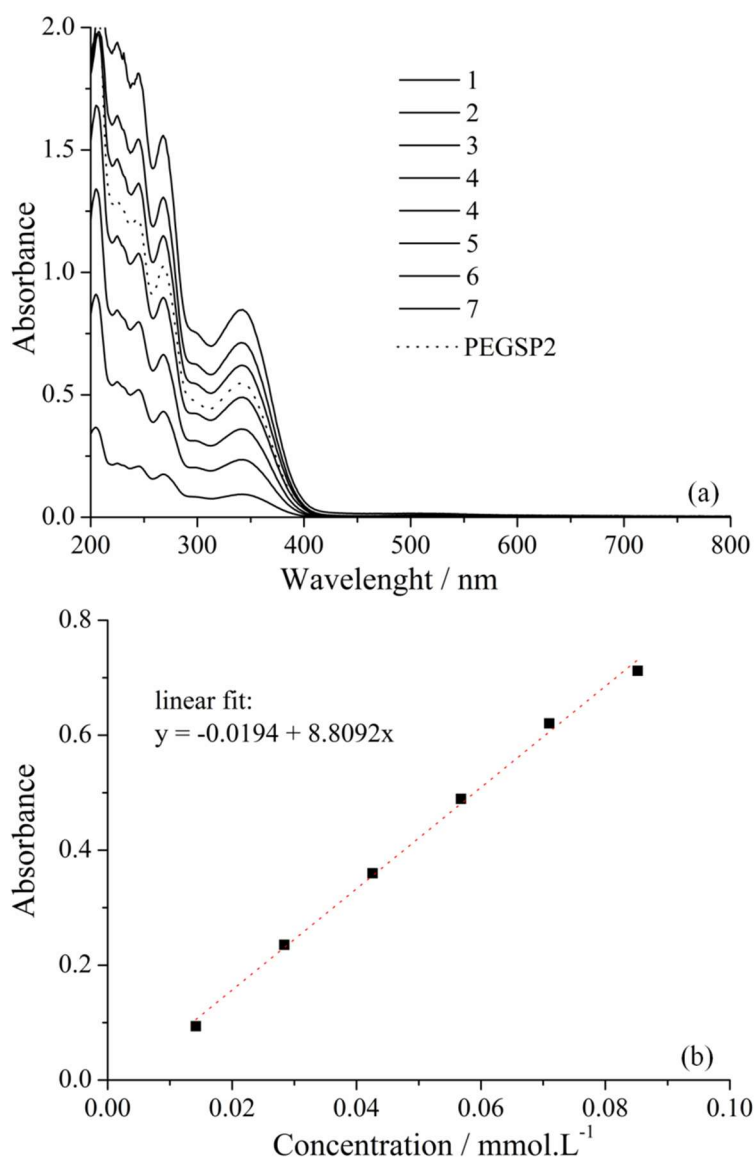

Figure S5. (a) Electronic spectra of SPCOOH dilutions from 0.014 to 0.71 mmol.L<sup>-1</sup> (solid lines) and PEGSP2 electronic spectrum at 0.031 mmol.L<sup>-1</sup> (dot line) and (b) calibration curve and linear fit for SPCOOH. All spectra were obtained in MeCN solvent using the maximum wavelength at 341 nm.

Supplementary Material 6:

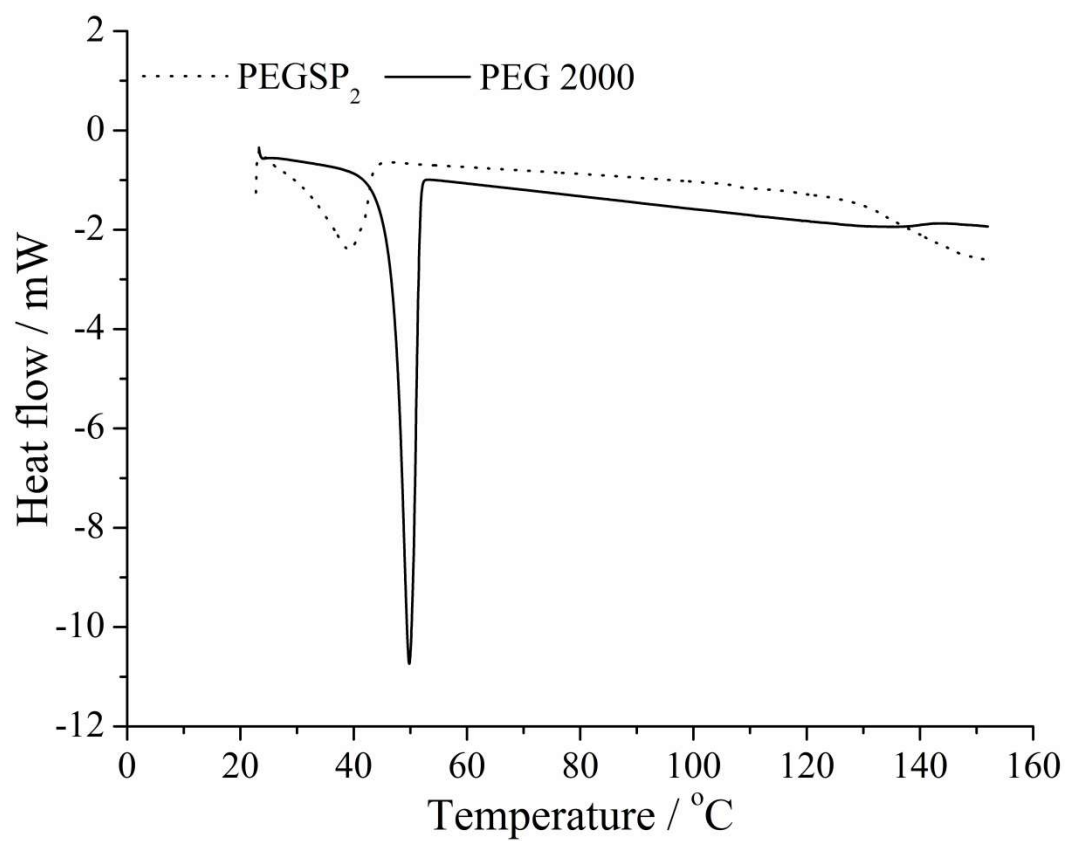

Figure S6. DSC curves for PEG 2000 and PEGSP2.

Supplementary Material 7:

Table S1. Calculations of  $\Delta_{\text{fus}}H$  of PEGSP2:

| Parameters                                                                                         | Values                  |
|----------------------------------------------------------------------------------------------------|-------------------------|
| <b>Mass</b>                                                                                        | 0.012887 g              |
| <b>X<sub>1</sub></b>                                                                               | 23.521673 °C            |
| <b>X<sub>2</sub></b>                                                                               | 46.082676 °C            |
| <b>I<sub>1</sub></b>                                                                               | 1 s                     |
| <b>I<sub>2</sub></b>                                                                               | 1463 s                  |
| <b>Area</b>                                                                                        | -30.183748048742 mW     |
| <b>X<sub>0</sub></b>                                                                               | 39.291683 °C            |
| <b><math>\Delta_{\text{fus}}H = [\text{Area} * (\text{I}_1 - \text{I}_2)] / \text{Mass}</math></b> | 3.424 J.g <sup>-1</sup> |

Table S2. Calculations of  $\Delta_{\text{fus}}H$  of PEG 2000:

| Parameters                                                                                         | Values                  |
|----------------------------------------------------------------------------------------------------|-------------------------|
| <b>Mass</b>                                                                                        | 0.009951 g              |
| <b>X<sub>1</sub></b>                                                                               | 27.507933 °C            |
| <b>X<sub>2</sub></b>                                                                               | 53.729233 °C            |
| <b>I<sub>1</sub></b>                                                                               | 1 s                     |
| <b>I<sub>2</sub></b>                                                                               | 1720 s                  |
| <b>Area</b>                                                                                        | -54.278186629807 mW     |
| <b>X<sub>0</sub></b>                                                                               | 49.816132 °C            |
| <b><math>\Delta_{\text{fus}}H = [\text{Area} * (\text{I}_1 - \text{I}_2)] / \text{Mass}</math></b> | 9.376 J.g <sup>-1</sup> |



Supplementary Material 8:

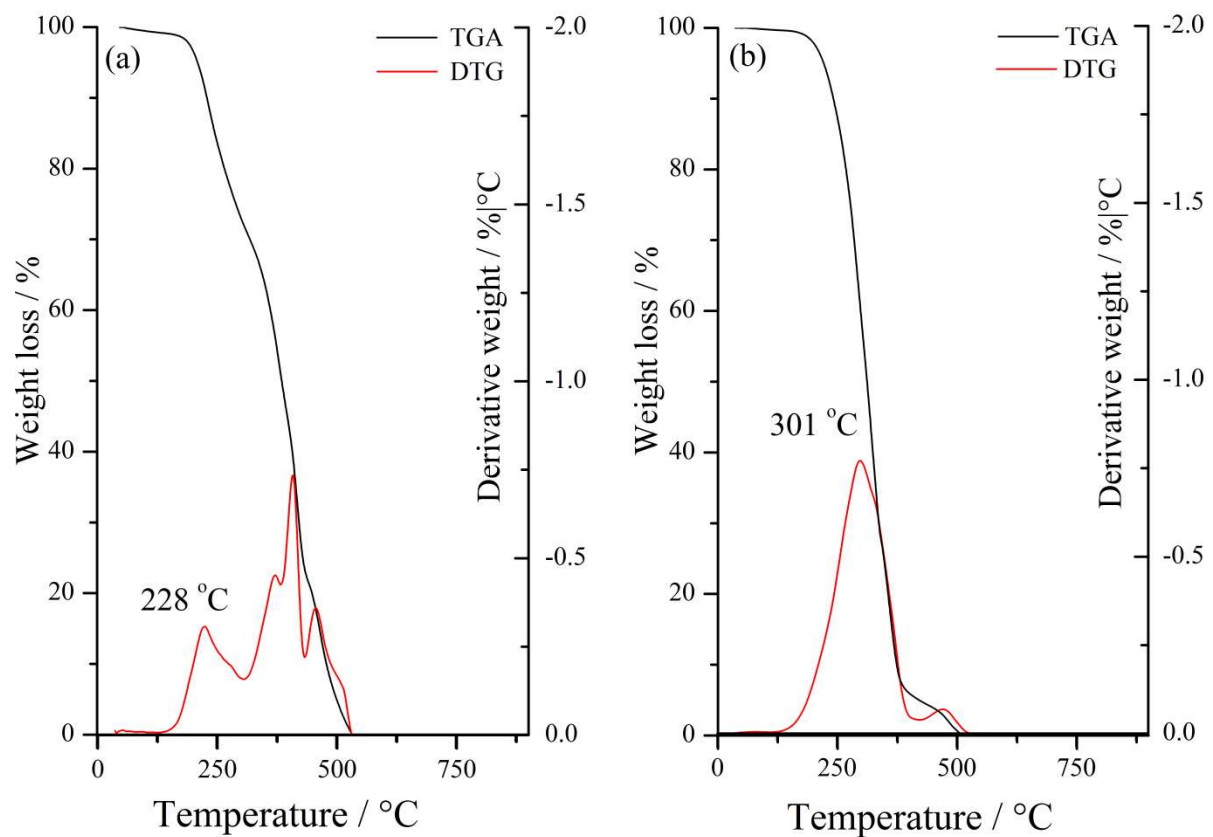

Figure S8. (a) TGA/DTG of PEGSP2 and (b) TGA/DTG of PEG 2000.

Supplementary Material 9:

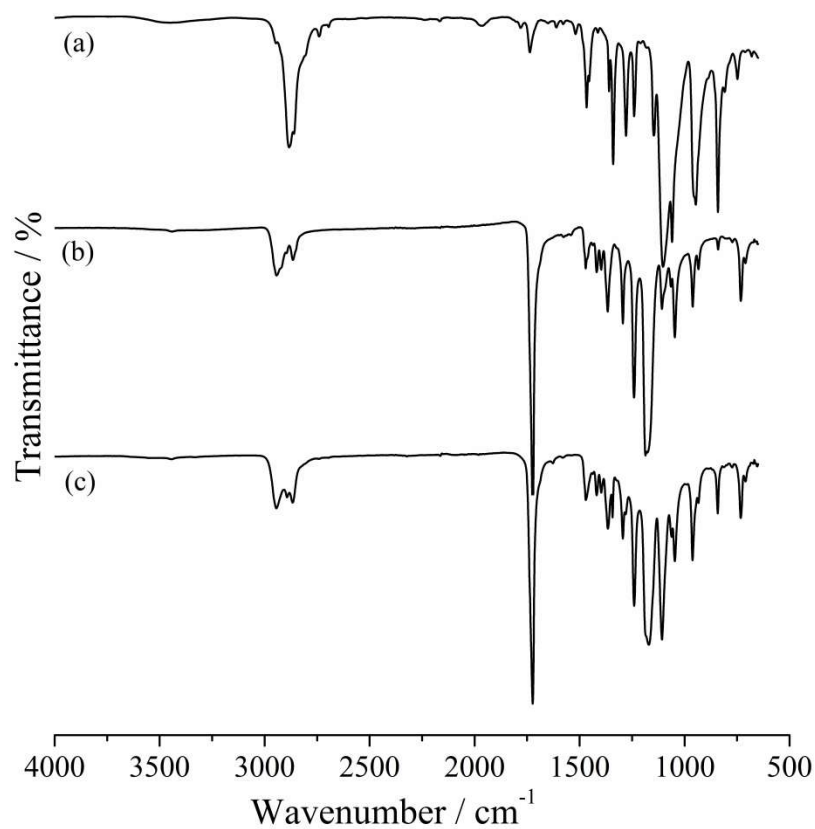

Figure S9. FTIR-ATR spectra of (a) PEGSP2 polymer, and electrospun fibers of (b) PCL + PEGSP2 30% wt and (c) pure PCL.

Supporting Information 10:

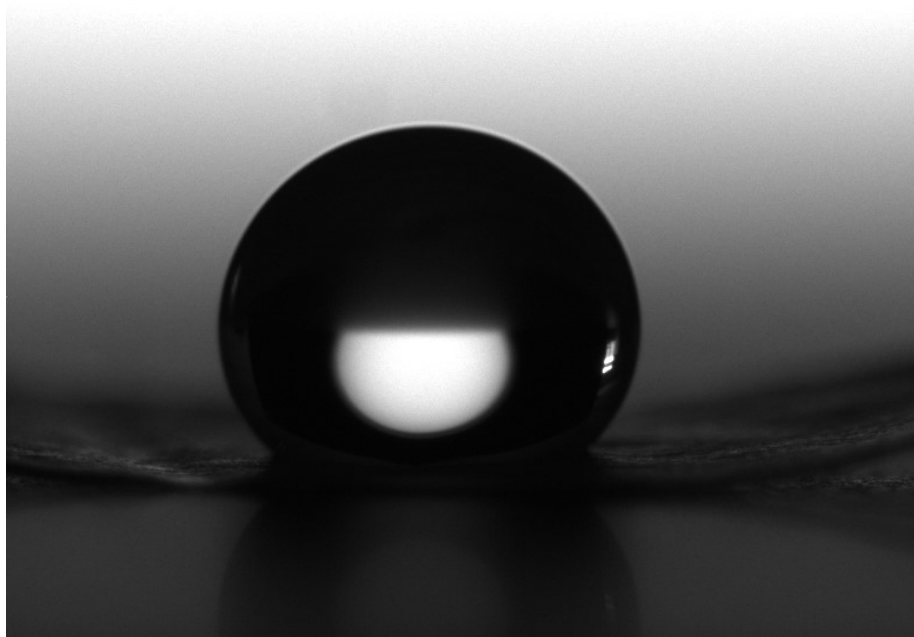

Figure S10. DSA (water contact angle) for pure PCL electrospun nanofibers.
